# Supplementary material for: Finding an Appropriate Mouse Model to Study the Impact of a Treatment for Friedreich Ataxia on the Behavioral Phenotype
Source: MDPI journal article supplement (doi:10.3390/genes14081654), 2023-08-19
Supplement: s1 [file s1]

Supplementary Table 1: Sequences of primers.

| PCR and qPCR primers |                 |                |                                                                                                                                                                                                                                                                                                                                                                                                |                                                                |
|----------------------|-----------------|----------------|------------------------------------------------------------------------------------------------------------------------------------------------------------------------------------------------------------------------------------------------------------------------------------------------------------------------------------------------------------------------------------------------|----------------------------------------------------------------|
|                      | Target          | Name           | F                                                                                                                                                                                                                                                                                                                                                                                              | R                                                              |
| Constuction plasmid  | Intron px330    | Hyb-In         | TGCCTGAGAGCGCAGTCGAGAAGggagtcgctgcga<br>cgctgc                                                                                                                                                                                                                                                                                                                                                 | TCCCCAACGTCCACATGGTGCGGCTAGCCaa<br>cctgaaaaaaagtatttcag        |
|                      |                 | U6-shRE        | GATCACGAGACTAGCCTCGAGCGGCGCCCCCTTACCAGGGCCTATTTCCCATTGATTCCTCATATT<br>TGCATATACGATACAGGCTGTTAGAGAGATAATTGGAATTAATTTGACTGTAAACACAAAGATATTAGT<br>ACAAAATACGTGACGTAGAAAGTAATAATTTCTTGGGTAGTTTGCAGTTTTAAATATGTTTTAAATG<br>GACTATCATATGCTTACCCTAACTGAAAGTATTTGATTCTTGGCTTTATATCTCTGTGGAAGGACG<br>AAACACCGGACCGGTGCAGATTGCTAGCAATTCGACCTCGAGACAAATGGCAGTATTCATCCACG<br>CTACTTATCTACGTAGGGTGCAGCGGCCT |                                                                |
|                      |                 | shRNA1         | CCGGGCTGGACTCTTAGCAGAGTTCTCGAGAAC<br>TCTGCTAAAGAGTCCAGCTTTTTT                                                                                                                                                                                                                                                                                                                                  | ctagaAAAAAGCTGGACTCTTTAGCAGAGTTC<br>TCGAGAACTCTGCTAAAGAGTCCAGC |
|                      |                 | shRNA3         | ccggACGTGGCCTCAACCAGATTGCTCGAGCAAA<br>TCTGGTTGAGGCCACGTTTTT                                                                                                                                                                                                                                                                                                                                    | ctagAAAAACGTGGCCTCAACCAGATTGCT<br>CGAGCAAATCTGGTTGAGGCCACGT    |
|                      |                 | shRNA4         | ccggCCATACACGTTTGAGGACTATCTCGAGATAGT<br>CCTCAAACGTGTATGTTTTT                                                                                                                                                                                                                                                                                                                                   | ctagAAAAACCATACACGTTTGAGGACTATCT<br>CGAGATAGTCTCAAACGTGTATGG   |
|                      |                 | shRNA6         | ccgGTGGACCTAAGCGTTATGACTctcagAGTCATA<br>ACGCTTAGGTCCACTttttt                                                                                                                                                                                                                                                                                                                                   | CTAGaaaaaGTGGACCTAAGCGTTATGACTctc<br>gagAGTCATAACGCTTAGGTCCA   |
|                      |                 | shRNA-scramble | ccggCCTAAGGTTAAGTCGCCCTCGctcagCGAGG<br>GCGACTTAACCTTAGGTTTTT                                                                                                                                                                                                                                                                                                                                   | ctagAAAAACCTAAGGTTAAGTCGCCCTCGCTC<br>GAGCGAGGGCGACTTAACCTTAGG  |
| PCR                  | mCherry         |                | GGCCATCATCAAGGAGTTC                                                                                                                                                                                                                                                                                                                                                                            | CCATGGTCTTCTTCGATTA                                            |
|                      | AAV frataxine   |                | GCTGTGCGCAGGACTTCTGG                                                                                                                                                                                                                                                                                                                                                                           | GCTTGTTCGGGGTTTGTTTA                                           |
| qPCR                 | mCherry         |                | TGAGGTCAAGACCCTACA                                                                                                                                                                                                                                                                                                                                                                             | GATGGTGTAGTCGTTGTG                                             |
| qRT-PCR              | Human frataxine |                | AAGCCATACAGCTTTGAGGACTA                                                                                                                                                                                                                                                                                                                                                                        | TTGGCGTCTGCTTGTGATCA                                           |
|                      | HPRT            |                | CAGGACTGAAAGACTTGCTCGAGAT                                                                                                                                                                                                                                                                                                                                                                      | CAGCAGGTCAGCAAAGAACTTATAGC                                     |

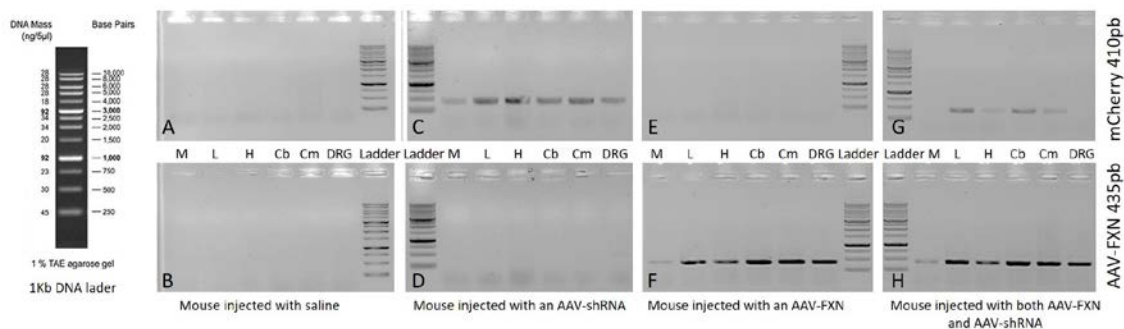

Supplementary Figure 1: For each mouse, two PCRs were made to confirm the treatment received by the presence of mCherry (shRNA) on the top and/or AAV-FXN on the bottom. Muscle (M), liver (L), heart (H), Cerebellum (Cb) and Cerebrum (Cm).

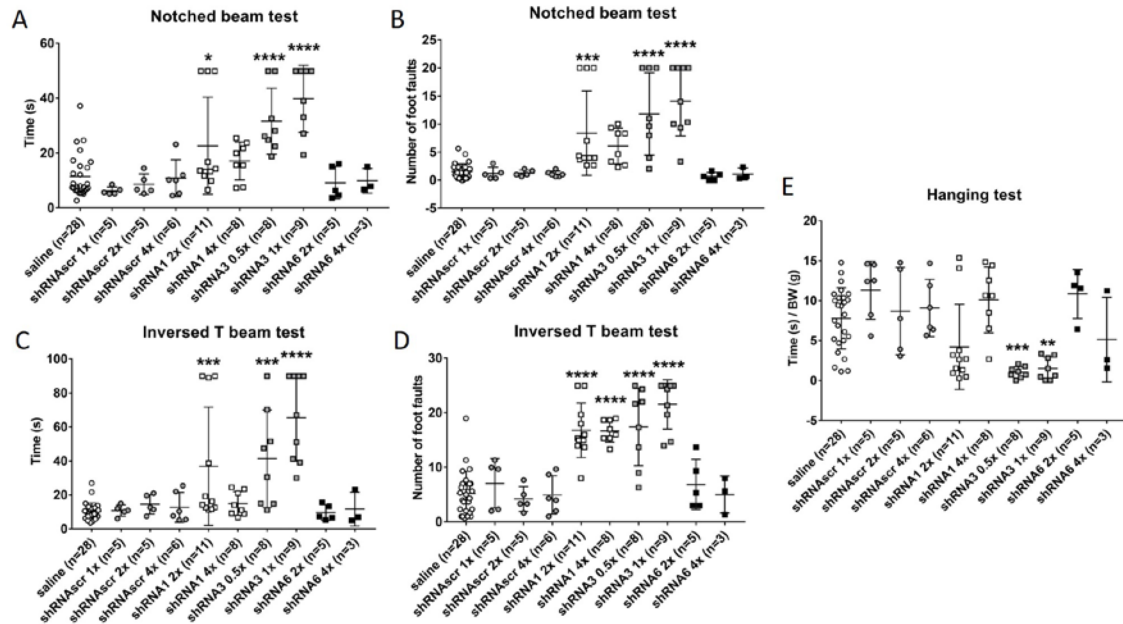

**Supplementary Figure 2:** The mice injected with an AAV containing different shRNAs were monitored with various behavior tests. The time taken by the YG8sR mice to cross the notched beam (A) and the inverted T beam (C) are illustrated 5 weeks after the injection. The number of foot faults made during the notched beam crossing (B) and the inverted T beam crossing (D) are also illustrated. In E, the hanging test is quantified as the ratio of hanging time/body weight. The results were analyzed by a two ways ANOVA test (Sidak's multiple comparisons test). \*\*\*\* p value < 0.0001 relative to the saline controls.
